# Supplementary material for: Low-latitude biostratigraphy and diversity of planktonic foraminifera from the middle Eocene to early Oligocene
Source: Copernicus journal article supplement (doi:10.5194/jm-44-601-2025), 2025-12-02
Supplement: Supplementary file 1 [file Table_S1_Amazon fan sample data.xlsx]

## Sheet: Sample_Data
Table S1 - Algodoal Well sample data, with planktonic foraminiferal preservation and diversity data. For preservation: G =good, MG = moderate-good, M = moderate, MP = moderate-poor, P = poor
Nos	Pres. Index	Pres.	Sample IDS	Date processed	Flask (g)	Flask + sed (g)	Date weighed (g)	Flask + dry sed (g)	Dry bulk sed weight (g)	Vial (g)	Vial + sed (g)	N/g	Coarse fraction (g)	Coarse fraction (%)	Treatment	Fraction processed	Individuals	No. of species	% Planktics	Species richness	Shannon diversity
1	5	G	5269	16.7.2014	110.08	130.86	24.7.2014	130.1	20.02	7.39	14.81	432	7.42	37.0629	Calgon	One 8th >125	400	54	85	54	3.474
2	4	MG	5275	26.4.2015	110.9	128.6	29.4.2015	128	17.1	7.5	14.4		6.9	40.3509	Calgon
3	5	G	5281	16.7.2014	109.79	129.33	24.7.2014	128.54	18.75	7.52	14.07	253	6.55	34.9333	Calgon	One 4th >125	414	52	91	52	3.415
4	4	MG	5287	26.4.2015	114.6	132.6	29.4.2015	131.9	17.3	7.5	14.2		6.7	38.7283	Calgon
5	3	M	5293	16.7.2014	96.32	115.56	24.7.2014	114.76	18.44	7.5		55	9.59	52	No	One half >125	265	44	87	44	3.042
6	4	MG	5305	26.4.2015	113.8	131.6	29.4.2015	131	17.2	7.5	15.6		8.1	47.093	Calgon
7	1	P	5311	16.7.2014	108.46	127.35	24.7.2014	126.65	18.19	7.48	19.72	118	12.24	67.2897	No	One 4th >125	360	47	85	47	3.369
8	4	MG	5329	26.4.2015	110.8	128.1	29.4.2015	127.4	16.6	7.1	13.2		6.1	36.747	Calgon
9	4	MG	5353	16.7.2014	117.24	133.58	24.7.2014	132.81	15.57	7.49	14.23	330	6.74	43.2884	Calgon	One 8th >125	278	44	95	44	3.266
10	4	MG	5371	26.4.2015	108.3	125.6	29.4.2015	125	16.7	7.5	14.9		7.4	44.3114	Calgon
11	3	M	5401	16.7.2014	113.31	132.95	24.7.2014	132.07	18.76	7.5	15.7	2041	8.2	43.71	Calgon	One 32nd >125	488	55	92	55	3.436
12	4	MG	5425	26.4.2015	132.7	150.9	29.4.2015	150.2	17.5	7.6	12.7		5.1	29.1429	Calgon
13	4	MG	5461	16.7.2014	110.17	127.35	24.7.2014	126.69	16.52	7.48	13.71	2645	6.23	37.7119	No	One 32nd >125	499	51	94	51	3.005
14	3	M	5473	26.4.2015	139.8	154.8	29.4.2015	154.2	14.4	7.5	14.4		6.9	47.9167	Calgon
15	4	MG	5479	16.7.2014	109.41	126.53	24.7.2014	125.88	16.47	7.52	12.72	3606	5.2	31.5726	Calgon	One 64th >125	279	44	95	44	2.901
16	2	MP	5485	26.4.2015	143.7	160.6	29.4.2015	160.1	16.4	7.5	16.8		9.3	56.7073	Calgon
17	3	M	5491	16.7.2014	111.28	130.76	24.7.2014	129.98	18.7	7.47	12.34	6781	4.87	26.0428	Calgon	One 128th >125	239	50	95	50	3.253
18	3	M	5497	26.4.2015	142.4	160.5	29.4.2015	159.9	17.5	7.5	11.7		4.2	24	Calgon
19	1	P	5503	16.7.2014	114.31	132.35	24.7.2014	131.66	17.35	7.51	16.83	2719	9.32	53.7176	No	One 32nd >125	775	61	89	61	3.154
20	3	M	5509	26.4.2015	142.2	158	29.4.2015	157.4	15.2	7.5	13.1		5.6	36.8421	Calgon
Sample processing notes: Initially started by soaking samples in milli-Q for thirty minutes prior to washing because consolidated material. This was unsuccessful so calgon subsequently employed. Submerged in calgon
and placed on shaker table for two days.
Samples in red processed by Kirsty Edgar 07/2014
Samples in black processed by Helena Hornsby 05-06/15
