# Supplementary material for: Low-latitude biostratigraphy and diversity of planktonic foraminifera from the middle Eocene to early Oligocene
Source: Copernicus journal article supplement (doi:10.5194/jm-44-601-2025), 2025-12-02
Supplement: Supplementary file 3 [file Table_S2_Ecogroups.xlsx]

## Sheet: Algodoal Data
Table S2 - Ecogroups used for Algodoal Well sample data. Ecogroup 1 = Open ocean mixed layer tropical/ subtropical, with symbionts, Ecogroup 2 = Open ocean mixed layer tropical/subtropical, without symbionts, Ecogroup 3 = Open ocean thermocline, Ecogroup 4 = Open ocean sub-thermocline, Ecogroup 6 = Upwelling/high productivity
Species	Ecogroup Code	Date reference
Acarinina boudreauxi	1	Aze et al. (2011)
Acarinina bullbrooki	1	Aze et al. (2011)
Acarinina collactea	1	Aze et al. (2011)
Acarinina cuneicamerata	1	Aze et al. (2011)
Acarinina echinata	1	Aze et al. (2011)
Acarinina mcgowrani	1	Aze et al. (2011)
Acarinina medizzai	1	Aze et al. (2011)
Acarinina praetopilensis	1	Aze et al. (2011)
Acarinina primitiva	1	Aze et al. (2011)
Acarinina punctocarinata	1	Aze et al. (2011)
Acarinina rohri	1	Aze et al. (2011)
Acarinina spp.	1	Aze et al. (2011)
Acarinina topilensis	1	Aze et al. (2011)
Cassigerinella chipolensis	6	Boersma & Shackleton, 1978; Pearson & Wade (2009), Pearson et al. (2018)
Cassigerinella eocaenica	6	Boersma & Shackleton, 1978; Pearson & Wade (2009), Pearson et al. (2018)
Catapsydrax africanus	4	Aze et al. (2011)
Catapsydrax dissimilis	4	Aze et al. (2011)
Catapsydrax howei	4	Aze et al. (2011)
Catapsydrax spp.	4	Aze et al. (2011)
Catapsydrax unicavus	4	Aze et al. (2011)
Chiloguembelina ototara	6	Luciani et al. (2010)
Ciperoella ciperoensis	2	Aze et al. (2011)
Ciperoella fariasi	1	Aze et al. (2011)
Clavigerinella eocanica	4	Aze et al. (2011)
Dentoglobigerina galavisi	3	Aze et al. (2011)
Dentoglobigerina globularis	3	Aze et al. (2011)
Dentoglobigerina prasaepis	4	Aze et al. (2011)
Dentoglobigerina pseudovenezuelana	3	Aze et al. (2011)
Dentoglobigerina rohri	4	Aze et al. (2011)
Dentoglobigerina sellii	4	Aze et al. (2011)
Dentoglobigerina spp.	-	-
Dentoglobigerina taci	2	Moore et al. (2014), Wade et al. (2018)
Dentoglobigerina tapuriensis	4	Aze et al. (2011)
Dentoglobigerina tripartita	4	van Eijden & Ganssen, 1995; Wade et al. (2018)
Dentoglobigerina venezuelana	4	Aze et al. (2011)
Dipsidripella danvillensis	-	-
Globigerina archaeobulloides	1	Aze et al. (2011)
Globigerina officinalis	1	Aze et al. (2011)
Globigerina praebulloides	1	Aze et al. (2011)
Globigerinatheka curryi	1	Aze et al. (2011)
Globigerinatheka euganea	1	Aze et al. (2011)
Globigerinatheka index	1	Aze et al. (2011)
Globigerinatheka korotkovi	1	Aze et al. (2011)
Globigerinatheka kugleri	1	Aze et al. (2011)
Globigerinatheka mexicana	1	Aze et al. (2011)
Globigerinatheka spp.	1	Aze et al. (2011)
Globigerinatheka subconglobata	1	Aze et al. (2011)
Globigerinatheka tropicalis	1	Aze et al. (2011)
Globigerinita glutinata	2	Majewski (2003), Pearson et al. (2001. 2018), Pearson & Wade, (2009)
Globorotaloides eovariabilis	4	Aze et al. (2011)
Globorotaloides hexagonus	4	Aze et al. (2011)
Globorotaloides permicrus	4	Aze et al. (2011)
Globorotaloides quadrocameratus	4	Aze et al. (2011)
Globorotaloides stainforthi	4	Poore & Matthews, (1984); Coxall & Spezzaferri (2018)
Globorotaloides suteri	4	Poore & Matthews, 1984; Barrera & Huber, 1991; Coxall & Spezzaferri (2018)
Globorotaloides testarugosa	4	Aze et al. (2011)
Globoturborotalita anguliofficinalis	2	Aze et al. (2011)
Globoturborotalita bassriverensis	2	Aze et al. (2011)
Globoturborotalita cf. woodi	1	Aze et al. (2011)
Globoturborotalita gnaucki	2	Aze et al. (2011)
Globoturborotalita martini	1	Aze et al. (2011)
Globoturborotalita ouachitaensis	1	Aze et al. (2011)
Globoturborotalita pseudopraebulloides	2	Pearson & Wade (2009), Spezzaferri et al. (2018)
Globoturborotalita sp. 1	-	-
Globoturborotalita spp.	-	-
Guembelitrioides nuttali	3	Aze et al. (2011)
Hantkenina alabamensis	2	Aze et al. (2011)
Hantkenina compressa	2	Aze et al. (2011)
Hantkenina dumblei	3	Aze et al. (2011)
Hantkenina lehneri	3	Aze et al. (2011)
Hantkenina spp.	-	-
Igorina anapetes	1	Aze et al. (2011)
Igorina broerdermanni	1	Aze et al. (2011)
Igorina lodoensis	1	Aze et al. (2011)
Igorina spp.	1	Aze et al. (2011)
Morozovella aragonensis	1	Aze et al. (2011)
Morozovella crater	1	Aze et al. (2011)
Morozovella spp.	1	Aze et al. (2011)
Morozovelloides bandyi	1	Aze et al. (2011)
Morozovelloides coronatus	1	Aze et al. (2011)
Morozovelloides crassatus	1	Aze et al. (2011)
Morozovelloides spp.	1	Aze et al. (2011)
Paragloborotalia birnageae	3	Hodell and Vayavananda (1993)
Paragloborotalia cf. acrostoma	3	Aze et al. (2011)
Paragloborotalia cf. mayeri	3	Aze et al. (2011)
Paragloborotalia cf. semivera	3	Aze et al. (2011)
Paragloborotalia griffinoides	4	Aze et al. (2011)
Paragloborotalia incognita	3	Aze et al. (2011)
Paragloborotalia kugleri	1	Aze et al. (2011)
Paragloborotalia kugleri grp.	1	Aze et al. (2011)
Paragloborotalia mayeri	3	Aze et al. (2011)
Paragloborotalia nana-opima	3	Aze et al. (2011)
Paragloborotalia opima nana	3	Aze et al. (2011)
Paragloborotalia opima opima	3	Aze et al. (2011)
Paragloborotalia pseudocontinuosa	3	Aze et al. (2011)
Paragloborotalia semivera	3	Aze et al. (2011)
Paragloborotalia sp. 1	-	-
Paragloborotalia spp.	-	-
Parasubbotina griffinae	6	Aze et al. (2011)
Parasubbotina inaequispira	6	Aze et al. (2011)
Parasubbotina pseudowilsoni	3	Aze et al. (2011)
Parasubbotina spp.	-	-
Parasubbotina varianta	3	Aze et al. (2011)
Planoglobanomalina spp.	2	Aze et al. (2011)
Planorotalites capdevilensis	2	Aze et al. (2011)
Praemurica? lozanai	2	Aze et al. (2011)
Pseudoglobigerinella bolivariana	6	Aze et al. (2011)
Pseudohastigerina micra	2	Aze et al. (2011)
Pseudohastigerina naguewichiensis	2	Aze et al. (2011)
Pseudohastigerina sharkriverensis	2	Aze et al. (2011)
Pseudohastigerina spp.	2	Aze et al. (2011)
Pseudohastigerina wilcoxensis	2	Aze et al. (2011)
Streptochilus martini	6	Luciani et al. (2010)
Subbotina angiporoides	3	Aze et al. (2011)
Subbotina corpulenta	3	Aze et al. (2011)
Subbotina crociapertura	4	Aze et al. (2011)
Subbotina eocaena	4	Aze et al. (2011)
Subbotina gortanii	4	Aze et al. (2011)
Subbotina hagni	3	Aze et al. (2011)
Subbotina jacksonensis	3	Aze et al. (2011)
Subbotina linaperta	3	Aze et al. (2011)
Subbotina roesnaesenis	3	Aze et al. (2011)
Subbotina senni	2	Pearson et al. 1993, 2001, Olsson et al. (2006)
Subbotina spp.	-	-
Subbotina tecta	3	Aze et al. (2011) (Subbotina sp. 1)
Subbotina utilisindex	4	Aze et al. (2011)
Subbotina yeguaensis	4	Aze et al. (2011)
Tenuitella angustiumbilicata	2	Poore and Matthews, 1984; van Eijden and Ganssen, 1995; Pearson et al. 1997; Pearson and Wade, 2009, Pearson et al. (2018)
Tenuitella clemenciae	-	-
Tenuitella gemma	-	-
Tenuitella insolita	4	Liu et al. (1997); Huber et al. (2006)
Tenuitella munda	2	Majewski (2003), Pearson & Wade, 2009, Pearson et al. (2018)
Tenuitella patefacta	-	-
Tenuitella praegemma	4	Liu et al. (1997); Huber et al. (2006)
Tenuitella sp. 1	-	-
Tenuitella spp.	-	-
Tenuitellinata sp. 1	-	-
Tenuitellinata spp.	-	-
Turborotalia ampliapertura	2	Aze et al. (2011)
Turborotalia cerroazulensis	2	Aze et al. (2011)
Turborotalia cocoaensis	3	Aze et al. (2011)
Turborotalia euapertura	4	Aze et al. (2011)
Turborotalia frontosa	4	Aze et al. (2011)
Turborotalia increbescens	2	Aze et al. (2011)
Turborotalia pomeroli	2	Aze et al. (2011)
Turborotalia possagnoensis	2	Aze et al. (2011)
Turborotalia spp.	-	-
Turborotalita carcoselleensis	2	Aze et al. (2011)
