# Supplementary material for: Low-latitude biostratigraphy and diversity of planktonic foraminifera from the middle Eocene to early Oligocene
Source: Copernicus journal article supplement (doi:10.5194/jm-44-601-2025), 2025-12-02
Supplement: Supplementary file 5 [file Table_S3_Age-Depth Data.xlsx]

## Sheet: Age-Depth
Table S3 - Biostratigraphic data from the Algodoal Well used to construct the age-depth model. CN data from Varol (2004). PF = planktonic foraminiferal age, CN = calcareous nannofossil age, Top Common - highest common occurrence, Top - highest occurrence, Base - lowest occurrence. mbdt = metres below drilling table, depth in parentheses is the mid-point
Marker	Marker Type	Age	Depth (mbdt)	Reference
Top Reticulofenestra umbilicus	CN (primary)	32.02	5281-5287 (5284)	Agnini et al. 2014
Top Common Pseudohastigerina. naguewichiensis	PF (secondary)	33.89	5305-5311 (5308)	Wade & Pearson (2008), Miller et al. (2008), Wade et al. (2011)
Top Turborotalia cerroazulensis	PF (secondary)	34.03	5305-5311 (5308)	Coccione et al. (1988), Nocchi et al. (1986)
Top Discoaster saipanensis	CN (primary)	34.44	5305-5311 (5308)	Agnini et al. 2014
Top Globigerinatheka index	PF (primary)	34.61	5311-5329 (5320)	Nocchi et al. (1986), Premoli Silva et al. (1988), Berggren, (1992)
Top Globigerinatheka semiinvoluta	PF (primary)	36.18	5311-5329 (5320)	Coccione et al. (1988), Berggren & Pearson (2005)
Top Chiasmolithus grandis	CN (secondary)	37.77	5311-5329 (5320)	Agnini et al. 2014
Top Morozovelloides crassatus	PF (primary)	38.25	5329-5353 (5341)	Wade et al. (2011)
Top Sphenolithus obtusus	CN (primary)	38.47	5425-5455 (5440)	Agnini et al. 2014
Top Acarinina mcgowrani	PF (secondary)	38.62	5353-5371 (5362)	Wade (2004)
Base Globigerinatheka semiinvoluta	PF (primary)	38.62	5353-5371 (5362)	Nocchi et al. (1986)
Top Turborotalia frontosa	PF (secondary)	39.42	5353-5371 (5362)	Berggren et al. (1985)
Top Common Sphenolithus spiniger	CN (secondary)	40.27	5485-5491 (5488)	Fornaciari et al. (2010), Agnini et al. (2014)
Top Acarinina bullbrooki	PF (secondary)	40.49	5371-5401 (5386)	Berggren et al. (1985)
Top Guembilitrioides nuttalli	PF (primary)	~42.07	5371-5401 (5386)	Berggren & Pearson (2005)
Base Turborotalia pomeroli	PF (secondary)	42.21	5461-5473 (5467)	Berggren et al. (1985)
Base Globigerinatheka index	PF (secondary)	42.64	5485-5491 (5488)	Stott & Kennett (1990)
Base Morozovelloides lehneri	PF (secondary)	43.15	5485-5491 (5488)	Berggren et al. (1985)
Top Morozovella aragonensis	PF (primary)	43.26	5485-5491 (5488)	Berggren et al. (1985)
Base Globigerinatheka kugleri	PF (primary)	~43.88	5509	Pearson et al. (2004), Wade et al. (2011)
