# Supplementary material for: Low-latitude biostratigraphy and diversity of planktonic foraminifera from the middle Eocene to early Oligocene
Source: Copernicus journal article supplement (doi:10.5194/jm-44-601-2025), 2025-12-02
Supplement: Supplementary file 7 [file Table_S5_Algodoal_Ecogroup_Data.xlsx]

## Sheet: Ecogroup Abundances
Table S5. Number of individuals, percentage of total assemblage, and richness for each ecogroup in the Algodoal Well. Mbdt = metres below drilling table
	Sample depths (mbdt)
Ecogroup (number of individuals)	5269	5281	5293	5311	5353	5401	5461	5479	5491	5503
Ecogroup1	41	45	39	19	43	178	292	155	137	386
Ecogroup2	75	95	78	96	63	113	83	34	43	228
Ecogroup3	72	70	56	65	38	129	69	60	36	66
Ecogroup4	130	123	39	107	100	47	41	25	17	60
Ecogroup6	22	38	23	43	4	12	6	4	1	5
	Sample depths (mbdt)
Ecogroup (%)	5269	5281	5293	5311	5353	5401	5461	5479	5491	5503
Ecogroup1	12.0588	12.1294	16.5957	5.75758	17.3387	37.1608	59.4705	55.7554	58.547	51.8121
Ecogroup2	22.0588	25.6065	33.1915	29.0909	25.4032	23.5908	16.9043	12.2302	18.3761	30.604
Ecogroup3	21.1765	18.8679	23.8298	19.697	15.3226	26.9311	14.053	21.5827	15.3846	8.85906
Ecogroup4	38.2353	33.1536	16.5957	32.4242	40.3226	9.81211	8.35031	8.99281	7.26496	8.05369
Ecogroup6	6.47059	10.2426	9.78723	13.0303	1.6129	2.50522	1.222	1.43885	0.42735	0.671141
	Sample depths (mbdt)
Ecogroup (richness)	5269	5281	5293	5311	5353	5401	5461	5479	5491	5503
Ecogroup1	3	4	3	3	5	17	24	17	23	28
Ecogroup2	8	12	8	10	9	8	8	7	11	9
Ecogroup3	11	6	5	8	9	13	9	9	7	8
Ecogroup4	17	15	14	14	13	10	6	6	5	6
Ecogroup6	8	6	7	5	3	3	1	3	1	4
