# Supplementary material for: Low-latitude biostratigraphy and diversity of planktonic foraminifera from the middle Eocene to early Oligocene
Source: Copernicus journal article supplement (doi:10.5194/jm-44-601-2025), 2025-12-02
Supplement: Supplementary file 9 [file Table_S6_Algodoal_Genera_Data.xlsx]

## Sheet: Generic Abundances
Table S6. Number of individuals and percentage of total assemblage for each of the major genera in the Algodoal Well. Mbdt = metres below drilling table
	Sample depths (mbdt)
Genus (number of specimens)	5269	5281	5293	5311	5353	5401	5461	5479	5491	5503
Acarinina	0	1	0	0	0	90	187	86	89	281
Catapsydrax	7	13	5	6	31	14	23	4	9	21
Dentoglobigerina	30	32	24	34	18	2	0	0	0	0
Globigerinatheka	0	0	0	0	26	3	13	5	4	25
Globorotaloides	38	17	18	36	3	2	3	3	1	1
Globoturborotalita	58	84	66	42	23	95	100	64	48	206
Morozovella+Morozovelloides	0	0	0	0	0	42	29	21	17	56
Paragloborotalia	52	61	48	31	18	44	7	6	1	12
Pseudohastigerina	0	2	4	5	7	18	9	6	13	12
Subbotina	41	26	8	37	71	40	35	17	8	48
Tenuitella	83	68	15	40	1	0	0	1	0	0
Turborotalia	52	42	44	68	72	47	42	17	12	45
	Sample depths (mbdt)
Genus (%)	5269	5281	5293	5311	5353	5401	5461	5479	5491	5503
Acarinina	0	0.241546	0	0	0	18.4426	37.4749	30.8244	37.2385	36.2581
Catapsydrax	1.75	3.1401	1.88679	1.66205	11.1511	2.86885	4.60922	1.43369	3.76569	2.70968
Dentoglobigerina	7.5	7.72947	9.0566	9.41828	6.47482	0.409836	0	0	0	0
Globigerinatheka	0	0	0	0	9.35252	0.614754	2.60521	1.79211	1.67364	3.22581
Globorotaloides	9.5	4.10628	6.79245	9.9723	1.07914	0.409836	0.601202	1.07527	0.41841	0.129032
Globoturborotalita	14.5	20.2899	24.9057	11.6343	8.27338	19.4672	20.0401	22.9391	20.0837	26.5806
Morozovella+Morozovelloides	0	0	0	0	0	8.60656	5.81162	7.52688	7.11297	7.22581
Paragloborotalia	13	14.7343	18.1132	8.58726	6.47482	9.01639	1.40281	2.15054	0.41841	1.54839
Pseudohastigerina	0	0.483092	1.50943	1.38504	2.51799	3.68852	1.80361	2.15054	5.43933	1.54839
Subbotina	10.25	6.28019	3.01887	10.2493	25.5396	8.19672	7.01403	6.09319	3.34728	6.19355
Tenuitella	20.75	16.4251	5.66038	11.0803	0.359712	0	0	0.358423	0	0
Turborotalia	13	10.1449	16.6038	18.8366	25.8993	9.63115	8.41683	6.09319	5.02092	5.80645
