# Supplementary material for: Low-latitude biostratigraphy and diversity of planktonic foraminifera from the middle Eocene to early Oligocene
Source: Copernicus journal article supplement (doi:10.5194/jm-44-601-2025), 2025-12-02
Supplement: Supplementary file [file jm-44-601-2025-supplement-title-page.pdf › jm-44-601-2025-supplement-title-page.pdf]

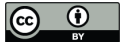

*Supplement of*

**Low-latitude biostratigraphy and diversity of planktonic foraminifera from the middle Eocene to early Oligocene**

**Adam Woodhouse et al.**

*Correspondence to:* Adam Woodhouse (woodhousea2@cardiff.ac.uk)

- jm-44-601-2025-supplement-title-page.pdf
- Table\_S1\_Amazon fan sample data.xlsx
- Table\_S2\_Ecogroups.xlsx
- Table\_S3\_Age-Depth Data.xlsx
- Table\_S4\_Algodoal\_Assemblage\_Data.csv
- Table\_S5\_Algodoal\_Ecogroup\_Data.xlsx
- Table\_S6\_Algodoal\_Genera\_Data.xlsx

The copyright of individual parts of the supplement might differ from the article licence.
